# Supplementary material for: Third order NLO properties of corannulene and its Li-doped dimers: effect of concave–convex and convex–convex structures
Source: Royal Society of Chemistry journal article supplement (doi:10.1039/c5ra09864e), 2015-01-01
Supplement: c5ra09864e1.pdf [file c5ra09864e1.pdf]

## **Supporting information for**

### **Third order NLO properties of corannulene and its Li-doped dimers: effect of the concave-convex and convex-convex stuctures**

Li Wang, Wen-Yong Wang, Xin-Yan Fang, Chang-Li Zhu, Yong-Qing Qiu\*

*Institute of Functional Material Chemistry, Faculty of Chemistry, Northeast Normal University,  
Changchun, Jilin 130024, People's Republic of China*

---

\* Corresponding Author. Fax: +86 431 85098768.  
E-mail addresses: qiuyq466@nenu.edu.cn (Y. Q. Qiu)

**Table S1** BSSE estimated by B97-D and M06-2X calculations for the eclipsed concave-convex model of corannulene dimer with various basis sets (energy in kcal/mol).

| Basis set | B97-D | M06-2X |          |
|-----------|-------|--------|----------|
| 6-31+G*   | 15.2  | 13.3   | Ref. 32  |
| 6-31+G**  | 15.5  | 13.8   | Our work |
| cc-pVTZ   | 16.1  | 12.3   | Ref. 34  |
| cc-pVQZ   | 16.6  | 13.3   | Ref. 29  |

**Table S2** Simulated wavelengths (nm), energies (eV), oscillator strengths ( $f$ ), major contribution for the studied dimers.

| Dimers    | State | $\lambda_{\text{gm}}$ | $E_{\text{gm}}$ | $f$    | MO transitions               |
|-----------|-------|-----------------------|-----------------|--------|------------------------------|
| <b>1a</b> | 23    | 252.4                 | 4.91            | 0.3951 | H-7→L (29%), H-6→L+1 (29%)   |
|           | 37    | 221.6                 | 5.60            | 0.6299 | H-2→L+4 (31%), H-2→L+7 (11%) |
|           |       |                       |                 |        | H-2→L+10 (4%)                |
| <b>2a</b> | 7     | 299.4                 | 4.14            | 0.1137 | H→L (49%), H-1→L+1 (48%)     |
|           | 16    | 253.4                 | 4.89            | 0.5323 | H-5→L+1 (38%), H-4→L (38%)   |
|           | 35    | 216.6                 | 5.72            | 0.9036 | H→L+13 (34%), H-6→L+4 (20%)  |
| <b>1b</b> | 19    | 254.1                 | 4.88            | 0.6421 | H-1→L+2 (24%), H→L+3 (22%)   |
|           |       |                       |                 |        | H-5→L+1 (14%), H-4→L (12%)   |
|           | 37    | 221.6                 | 5.60            | 0.6299 | H-2→L+4 (31%), H-2→L+7(11%)  |
|           |       |                       |                 |        | H-2→L+10 (14%)               |
| <b>2b</b> | 16    | 266.6                 | 4.65            | 0.6503 | H-5→L+1 (46%), H-4→L (46%)   |
|           | 35    | 215.2                 | 5.76            | 0.5444 | H-3→L+5 (34%), H-6→L+4(20%)  |

<sup>a</sup> assignment: H = HOMO, L = LUMO, H-1= HOMO-1, L+1 = LUMO+1, *etc.*

**Table S3** The orbital overlap integral ( $S_{ij}$ , a.u.) and electronic coupling ( $V_{ij}$ , a.u.) between HOMOs of two monomers of the studied dimers.

| Dimers    | $S_{ij}$ | $V_{ij}$ |
|-----------|----------|----------|
| <b>1a</b> | 0.013    | -0.009   |
| <b>2a</b> | 0.112    | -0.080   |
| <b>1b</b> | -0.004   | 0.003    |
| <b>2b</b> | -1.361   | 0.975    |

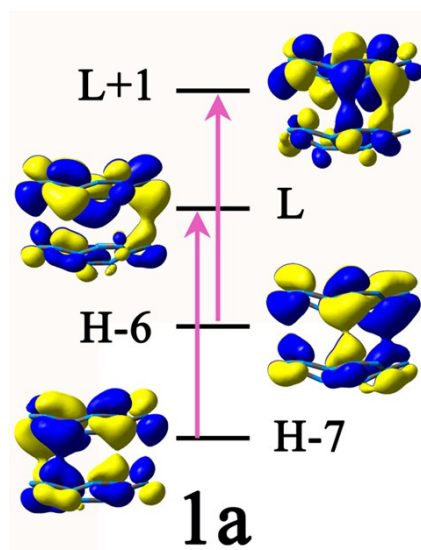

**Fig. S1** Orbital diagrams of **1a** involved in the dominant electron transition (H = HOMO, H-1 = HOMO-1, L = LUMO, L+1 = LUMO, etc.).

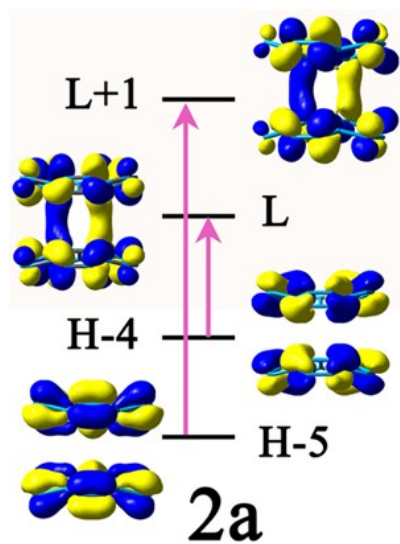

**Fig. S2** Orbital diagrams of **2a** involved in the dominant electron transition.

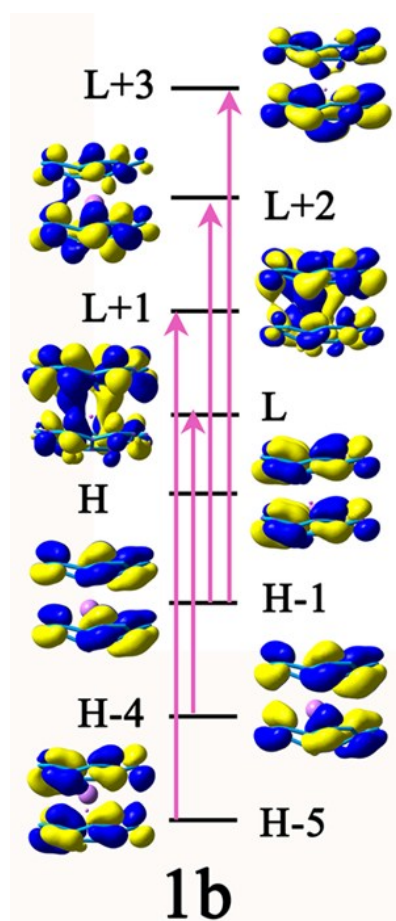

**Fig. S3** Orbital diagrams of **1b** involved in the dominant electron transition.

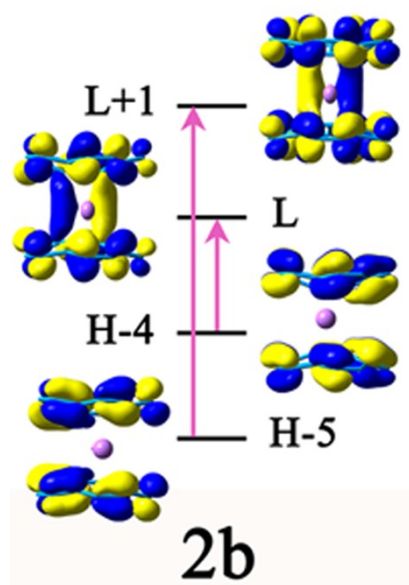

**Fig. S4** Orbital diagrams of **2b** involved in the dominant electron transition.
